# Supplementary material for: Three-dimensional microporous and mesoporous covalent organic frameworks based on cubic building units
Source: Royal Society of Chemistry journal article supplement (doi:10.1039/d2sc02365b), 2022-01-01
Supplement: d2sc02365b1.pdf [file d2sc02365b1.pdf]

## Supplemental Information

### **Three-dimensional microporous and mesoporous covalent organic frameworks based on cubic building units**

*Li Liao, Xinyu Guan, Haorui Zheng, Zerong Zhang, Yaozu Liu, Hui Li,\* Liangkui Zhu, Shilun Qiu,*

*Xiangdong Yao,\* and Qianrong Fang\**

## Table of contents

|                    |                                                        |        |
|--------------------|--------------------------------------------------------|--------|
| <b>Section S1</b>  | Materials and characterization                         | S3-S8  |
| <b>Section S2</b>  | SEM images                                             | S9     |
| <b>Section S3</b>  | TEM images                                             | S10    |
| <b>Section S4</b>  | FT-IR spectra                                          | S11    |
| <b>Section S5</b>  | Solid-state $^{13}\text{C}$ NMR spectra                | S12    |
| <b>Section S6</b>  | TGA curves                                             | S13    |
| <b>Section S7</b>  | Chemical stability                                     | S14    |
| <b>Section S8</b>  | PXRD patterns                                          | S15    |
| <b>Section S9</b>  | Gas adsorption                                         | S16-23 |
| <b>Section S10</b> | Dye adsorption                                         | S24    |
| <b>Section S11</b> | Unit cell parameters and fractional atomic coordinates | S25-26 |
| <b>Section S12</b> | References                                             | S27-29 |

## Section S1. Materials and characterization

### S1.1 Materials

All starting materials and solvents, unless otherwise noted, were obtained from J&K scientific LTD and used without further purification. All products were isolated and handled under nitrogen using either glovebox or Schlenk line techniques.

### S1.2 Instruments

A Bruker AV-400 NMR spectrometer was applied to record the liquid  $^1\text{H}$  NMR spectra. Solid-state  $^{13}\text{C}$  NMR spectra were recorded on an AVIII 500 MHz solid-state NMR spectrometer. The FTIR spectra (KBr) were obtained using a SHIMADZU IRAffinity-1 Fourier transform infrared spectrophotometer. A SHIMADZU UV-2450 spectrophotometer was used for all absorbance measurements. Thermogravimetric analysis (TGA) was recorded on a SHIMADZU DTG-60 thermal analyzer under  $\text{N}_2$ . The operational range of the instrument was from 30 °C to 800 °C at a heating rate of 10 °C  $\text{min}^{-1}$  with  $\text{N}_2$  flow rate of 30 mL  $\text{min}^{-1}$ . PXRD data were collected on a PANalytical B.V. Empyrean powder diffractometer using a  $\text{Cu K}\alpha$  source ( $\lambda = 1.5418 \text{ \AA}$ ) over the range of  $2\theta = 2.0\text{--}40.0^\circ$  with a step size of  $0.02^\circ$  and 2 s per step. The sorption isotherm for  $\text{N}_2$  was measured by using a Quantachrome Autosorb-IQ analyzer with ultra-high-purity gas (99.999% purity). To estimate pore size distributions for JUC-588 and JUC-589, nonlocal density functional theory (NLDFT) was applied to analyze the  $\text{N}_2$  isotherm on the basis of the model of  $\text{N}_2@77\text{K}$  on carbon with slit pores and the method of non-negative regularization. For scanning electron microscopy (SEM) image, JEOL JSM-6700 scanning electron microscope was applied. Transmission electron microscopy (TEM) image was obtained on JEM-2100 transmission electron microscopy.

### S1.3 Synthesis of 5-(4,4,5,5-tetramethyl-1,3,2-dioxaborolan-2-yl)isophthalaldehyde<sup>1</sup>

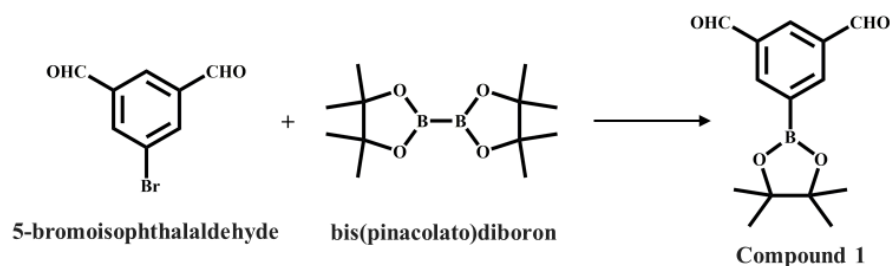

To a solution of 5-bromoisophthalaldehyde (15.0 g, 70.4 mmol, 1.0 eq.), bis(pinacolato)diboron (19.7g, 77.4 mmol, 1.1 eq.) and KOAc (20.7 g, 211.2 mmol, 3.0 eq.) in anhydrous 1,4-dioxane (100 mL), Pd(dppf)Cl<sub>2</sub> (1.54 g, 2.11 mmol, 0.03 eq.) was added. The reaction was heated to 90 °C and stirred for 16 h. The solid precipitate was filtered off and washed with Et<sub>2</sub>O. The filtrate was washed with water (100 mL) and brine (100 mL), dried over MgSO<sub>4</sub> and evaporated to dryness. The residue was dissolved in DCM and purified by flash chromatography on silica gel, eluting with a 0 to 50% EtOAc in DCM gradient. Likely fractions were evaporated in vacuo, affording the 5-(4,4,5,5-tetramethyl-1,3,2-dioxaborolan-2-yl)isophthalaldehyde (Compound 1) as an oil that solidifies on standing (15.9 g, 61.2 mmol, 87%). <sup>1</sup>H NMR (500 MHz, CDCl<sub>3</sub>): δ = 10.11 (s, 2 H), 8.54 (d, 2 H, *J* = 1.7 Hz), 8.44 (t, 1 H, *J* = 1.7 Hz), 1.36 (s, 12 H). HRMS-Cl: calcd. for C<sub>14</sub>H<sub>18</sub>BO<sub>4</sub> [M+1]<sup>+</sup> 260.1329, found 260.1319.

### S1.4 Synthesis of 3,3',5,5'-Tetraethynyl-2,2',6,6'-tetramethoxy-4,4'-dimethylbiphenyl<sup>2,3</sup>

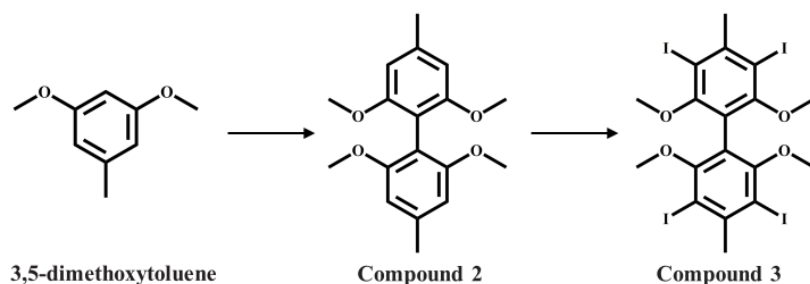

**Synthesis of Compound 2:** nBuLi (20 mL, 22 mmol, 2.2 M in hexane) was added to a mixture of 3,5-dimethoxytoluene (3.04 g, 20 mmol) and tetramethylethylenediamine (2.78 g, 24 mmol) in dry THF (50 mL) at -78 °C. After stirring for 5 min at -78 °C, the temperature was raised to 0 °C. 2.5 h later, FeCl<sub>3</sub> (3.88 g, 24 mmol) was added in portions and then the reaction mixture was warmed to room temperature. After stirring for 8 h at room temperature, HCl (ca. 50 mL,

1 M) was added and the mixture was extracted with ethyl acetate (50 mL × 3). The organic layers were dried with anhydrous Na<sub>2</sub>SO<sub>4</sub>. After evaporation under reduced pressure, the residue was washed with hexane to give the Compound 2 (1.9 g, 65 % yield). <sup>1</sup>H NMR (CDCl<sub>3</sub>): δ = 6.47 (s, 4 H); 3.70 (s, 12 H); 2.38 (s, 6 H) ppm. <sup>13</sup>C NMR (CDCl<sub>3</sub>): δ = 158.23, 138.65, 109.57, 105.58, 56.12, 22.33 ppm.

**Synthesis of Compound 3:** To a mixture of Compound 2 (2.0 g, 6.6 mmol), solid iodine (3.5 g, 13.5 mmol), and HIO<sub>4</sub>·2H<sub>2</sub>O (1.55 g, 6.7 mmol) in a 250 mL flask, CH<sub>3</sub>COOH/H<sub>2</sub>O/H<sub>2</sub>SO<sub>4</sub> (120/24/3.6 mL) was added. The resulting mixture was stirred at 120 °C for 3 days. After it was cooled down to room temperature, the reaction mixture was diluted with 250 mL of water. The precipitate was filtered and washed with water. The pink solid was dissolved in 100 mL of CHCl<sub>3</sub> and washed with saturated Na<sub>2</sub>S<sub>2</sub>O<sub>3</sub> solution to remove iodine residue. The CHCl<sub>3</sub> phase was evaporated to ca. 20 mL under reduced pressure, and then, 100 mL of methanol was added. 3,3',5,5'-Tetraethynyl-2,2',6,6'-tetramethoxy-4,4'-dimethylbiphenyl (Compound 3) was collected as a white solid (4.8 g, 90% yield). <sup>1</sup>H NMR (300 MHz, CDCl<sub>3</sub>) δ = 3.58 (s, 12 H), 2.96 (s, 6 H). <sup>13</sup>C NMR (75 MHz, CDCl<sub>3</sub>) δ = 158.5, 145.6, 121.0, 93.1, 60.8, 36.4 ppm.

### S1.5 Synthesis of BDFTM

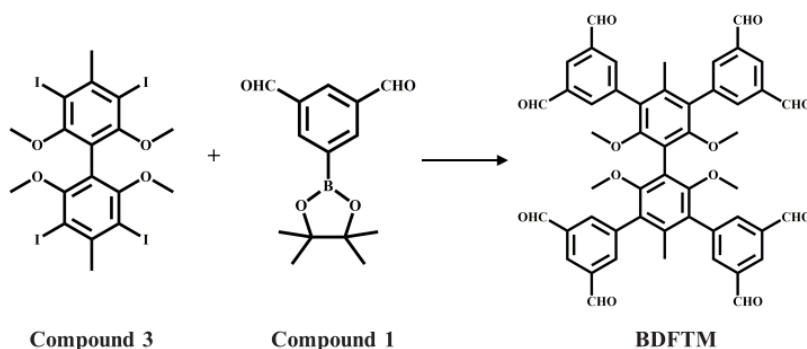

To a flask containing 1,4-Dioxane/H<sub>2</sub>O (80 mL/8 mL), Compound 3 (1.52 g, 1.9 mmol), Compound 1 (3.5 g, 15.1 mmol), palladium tetrakis(triphenylphosphine) (0.2 g, 0.2 mmol), and cesium carbonate (4.9 g, 15.0 mmol) were added. The mixture was heated under nitrogen at 90 °C for 3 days. After cooling to room temperature, the solvent was removed under reduced pressure. Then the residues were dissolved in ethylacetate, washed with water and brine, and dried over anhydrous Na<sub>2</sub>SO<sub>4</sub>. After that, the solvent was evaporated under reduced pressure and the crude product was purified by column chromatography to yield BDFTM as a

white solid (75% yield).  $^1\text{H}$  NMR (400 MHz,  $\text{CDCl}_3$ , ppm):  $\delta$  = 10.17. (s, 8 H), 8.41 (t,  $J$  = 1.6 Hz, 4 H), 8.14 (d,  $J$  = 1.6 Hz, 8 H), 3.3 (s, 12 H), 1.88 (s, 6 H).  $^{13}\text{C}$  NMR (100 MHz,  $\text{CDCl}_3$ )  $\delta$  = 190.20, 156.03, 139.19, 136.54, 136.50, 135.5, 129.65, 129.12, 120.20, 60.71, 18.96 ppm.

### S1.6 Synthesis of 4,4'-(9H-carbazole-3,6-diyl)dibenzaldehyde

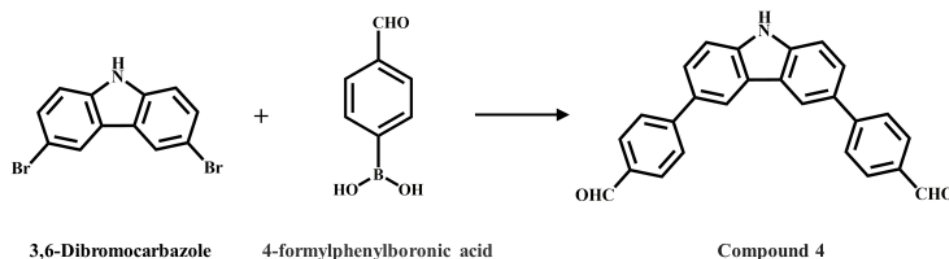

A mixture of 3,6-dibromocarbazole (975.0 mg, 3.0 mmol), (4-formylphenyl)boronic acid (1.13 g, 7.5 mmol),  $\text{Pd}(\text{PPh}_3)_4$  (20 mg), 1,4-Dioxane (20 mL) and aqueous solution of  $\text{K}_2\text{CO}_3$  (1 M, 20 mL) was refluxed at 90 °C overnight under  $\text{N}_2$  atmosphere. Then the mixture was cooled down to room temperature. The solid was isolated by filtration, washed three times with ethyl acetate and then washed another three times with water. The residue was dissolved in DCM and purified by column chromatography to yield compound 4 as a yellow solid (73% yield).  $^1\text{H}$  NMR (400 MHz,  $\text{DMSO}-d_6$ ):  $\delta$  = 11.60 (s, 1 H), 10.05 (s, 2 H), 8.784 (d, 2 H,  $J$  = 1.6 Hz), 8.036 (dd, 8 H,  $J_1$  = 8 Hz,  $J_2$  = 8 Hz), 7.87 (dd, 2 H,  $J_1$  = 1.6 Hz,  $J_2$  = 1.6 Hz), 7.63 (d, 2 H,  $J$  = 16 Hz).  $^{13}\text{C}$  NMR (100 MHz,  $\text{CDCl}_3$ )  $\delta$  = 192.30, 146.74, 140.35, 134.06, 129.38, 126.94, 126.52, 123.25, 118.52, 111.56 ppm.

### S1.7 Synthesis of TBFPC

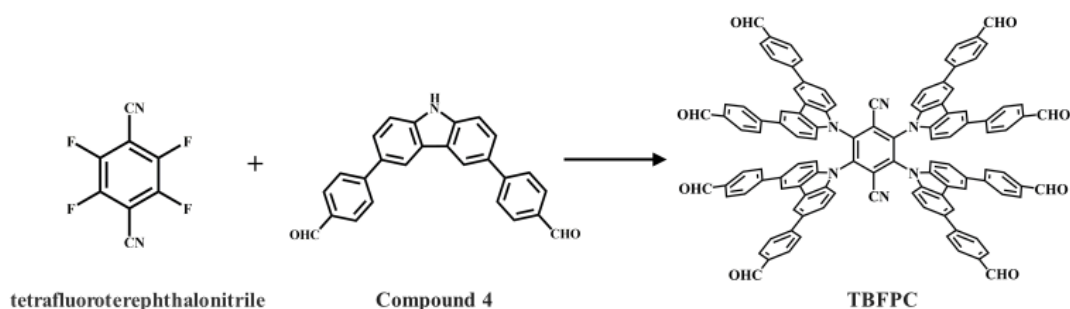

Under a nitrogen atmosphere, Compound 4 (3.77 g, 10.5 mmol) was dissolved in dry THF (120mL). Upon sodium hydride (60% dispersion, 0.8 g, 20.0 mmol) being added, the color of the mixture turned yellow along with the production of a lot of gas. The suspension was stirred at room temperature for 30 min. After the subsequent addition of 2,3,5,6-

tetrafluoroterephthalonitrile (0.5 g, 2.5 mmol), the reaction mixture was stirred for 24h. Eventually, the color of the suspension converted from yellow to red. The suspension was separated through the suction filter to afford a red solid. The solid was then washed with water (100 mL × 3), THF (100 mL × 3) and dried in air to give the TBFPC (70% yield). <sup>1</sup>H NMR (400 MHz, DMSO-*d*<sub>6</sub>): δ = 10.064 (s, 1 H), 8.60 (s, 1 H), 8.115 (d, 1 H, *J* = 8 Hz), 7.972 (dd, 4 H, *J*<sub>1</sub> = 8 Hz, *J*<sub>2</sub> = 8 Hz), 7.80 (d, 1 H, *J* = 8 Hz). <sup>13</sup>C NMR (100 MHz, DMSO-*d*<sub>6</sub>) δ = 193.14, 146.41, 141.47, 140.42, 135.20, 133.09, 130.59, 127.77, 125.70, 124.88, 123.11, 120.23, 112.48 ppm.

### S1.8 Synthesis of JUC-588

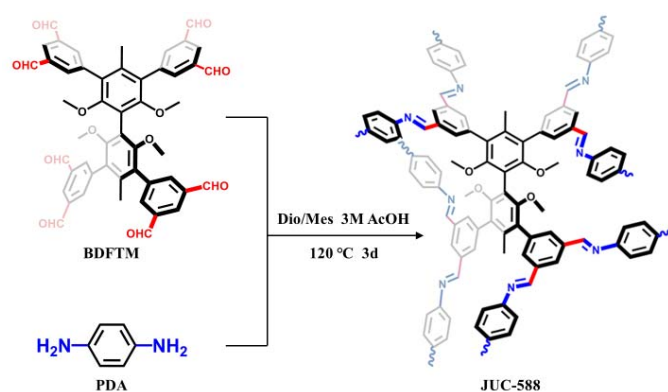

BDFTM (0.03 mmol, 24.9 mg) and PDA (0.12 mmol, 13.0 mg) were weighted into a Pyrex tube (volume: ca. 20.0 mL with a body length of 18.0 cm and neck length of 9.0 cm), and the mixture was added into 0.8 mL of dioxane, 0.2 mL of mesitylene and 0.1 mL of acetic acid (3 M). The Pyrex tube was flash frozen in a liquid nitrogen bath, evacuated to an internal pressure of ca. 19.0 mbar and flame-sealed, reducing the total length by ca. 10.0 cm. Upon warming to room temperature, the tube was placed in an oven at 120 °C for 3 d. The resulting precipitate was filtered, exhaustively washed by Soxhlet extractions with dioxane for 48 h. The obtained powder was immersed in anhydrous acetone, and the solvent was exchanged with fresh acetone for several times. The wet sample was then transfer to a super critical drier (Samdri-PTV-3D), in which the sample was washed with six times of liquid CO<sub>2</sub>, and exchanged with fresh CO<sub>2</sub> for six times with the interval of half hour. The system was heat up to 45 °C to bring about the supercritical state of the CO<sub>2</sub>, which was bleed after half hour in very slow flow rate to ambient pressure. The sample was then transferred to vacuum chamber and evacuated to

20 mTorr under room temperature, yielding yellow powder for N<sub>2</sub> adsorption measurements.

Anal. Cald: C: 81.02; H: 2.92; N: 10.22. Found: C: 81.10; H: 2.89; N: 10.30.

### S1.9 Synthesis of JUC-589

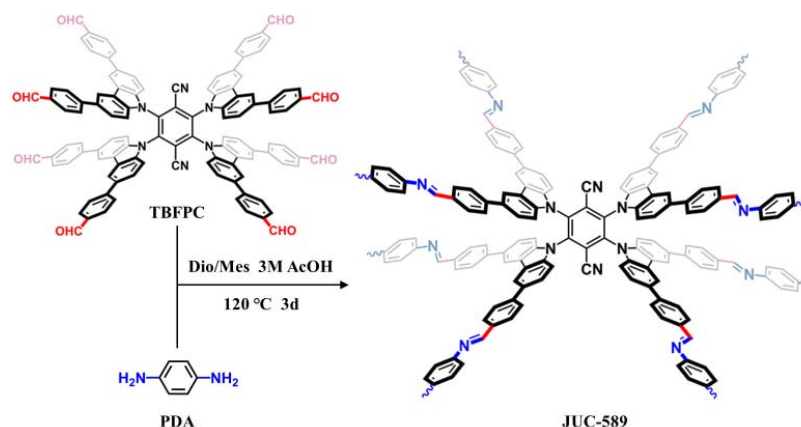

TBFPC (0.02 mmol, 32.4 mg) and PDA (0.08 mmol, 8.65 mg) were weighted into a Pyrex tube (volume: ca. 20.0 mL with a body length of 18.0 cm and neck length of 9.0 cm), and the mixture was added into 0.5 mL of dioxane, 0.5 mL of mesitylene and 0.1 mL of acetic acid (3 M). The Pyrex tube was flash frozen in a liquid nitrogen bath, evacuated to an internal pressure of ca. 19.0 mbar and flame-sealed, reducing the total length by ca. 10.0 cm. Upon warming to room temperature, the tube was placed in an oven at 120 °C for 3 d. The resulting precipitate was filtered, exhaustively washed by Soxhlet extractions with dioxane for 48 h. The obtained powder was immersed in anhydrous acetone, and the solvent was exchanged with fresh acetone for several times. The wet sample was then transfer to a super critical drier (Samdri-PTV-3D), in which the sample was washed with six times of liquid CO<sub>2</sub>, and exchanged with fresh CO<sub>2</sub> for six times with the interval of half hour. The system was heat up to 45 °C to bring about the supercritical state of the CO<sub>2</sub>, which was bled after half hour in very slow flow rate to ambient pressure. The sample was then transferred to vacuum chamber and evacuated to 20 mTorr under room temperature, yielding red powder for N<sub>2</sub> adsorption measurements.

Anal. Cald: C: 85.55; H: 4.19; N: 10.26. Found: C: 85.49; H: 4.23; N: 10.28.



## Section S2. SEM images

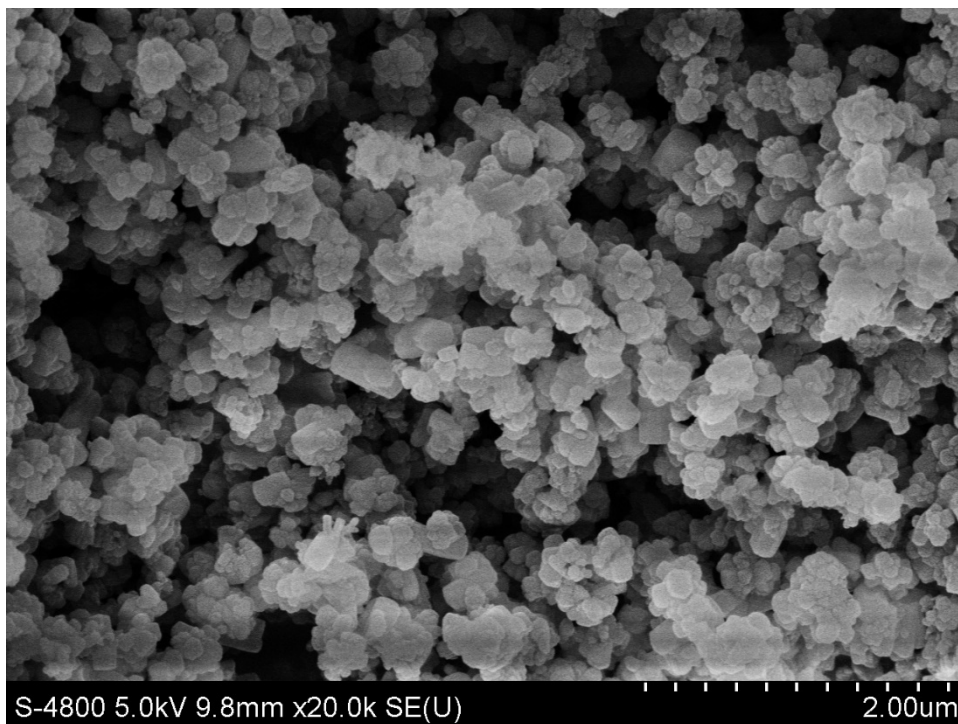

**Figure S1.** SEM image of JUC-588.

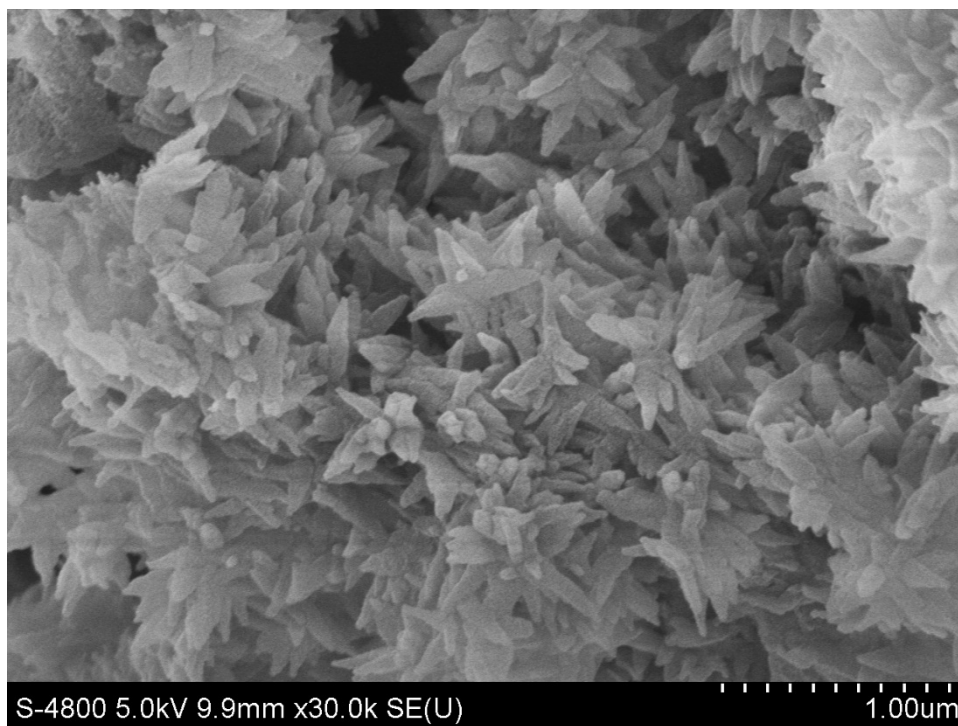

**Figure S2.** SEM image of JUC-589.

### Section S3. TEM images

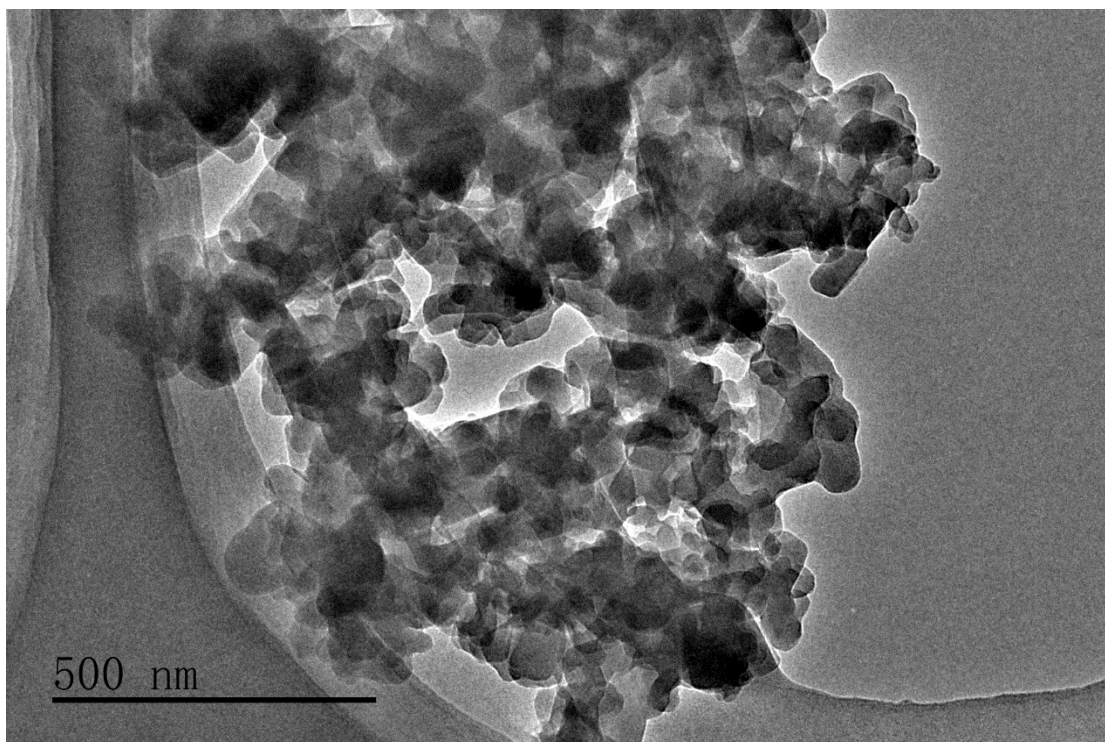

**Figure S3.** TEM image of JUC-588.

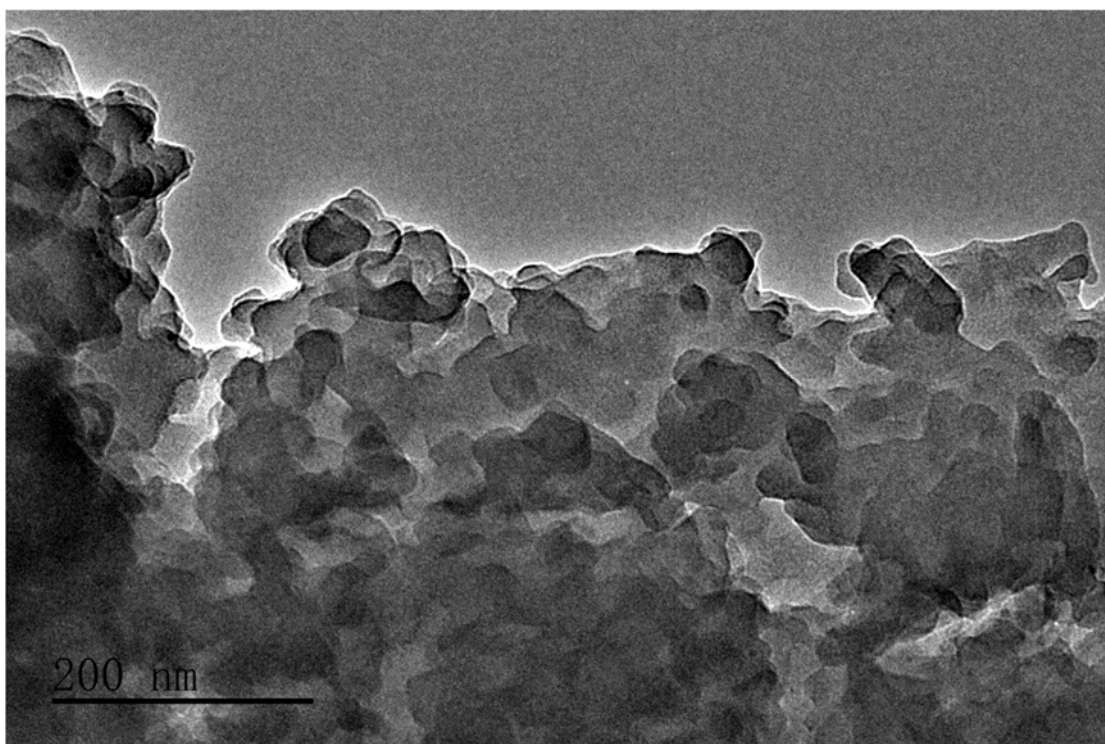

**Figure S4.** TEM image of JUC-589.

## Section S4. FT-IR spectra

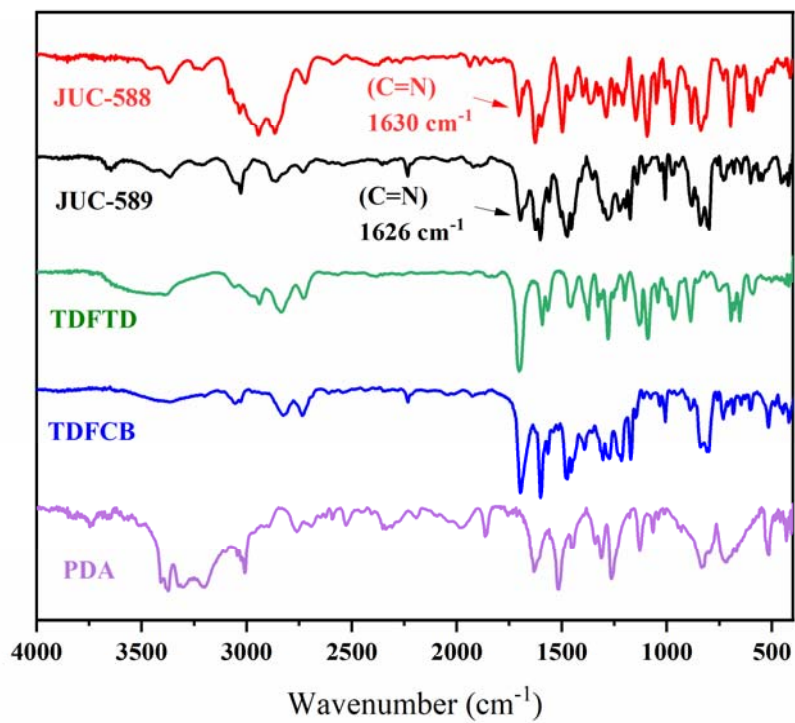

**Figure S5.** FT-IR spectra of JUC-588 (red) and JUC-589 (black), TDFTD (green), TDFCB (blue), PDA (purple).

## Section S5. NMR spectra

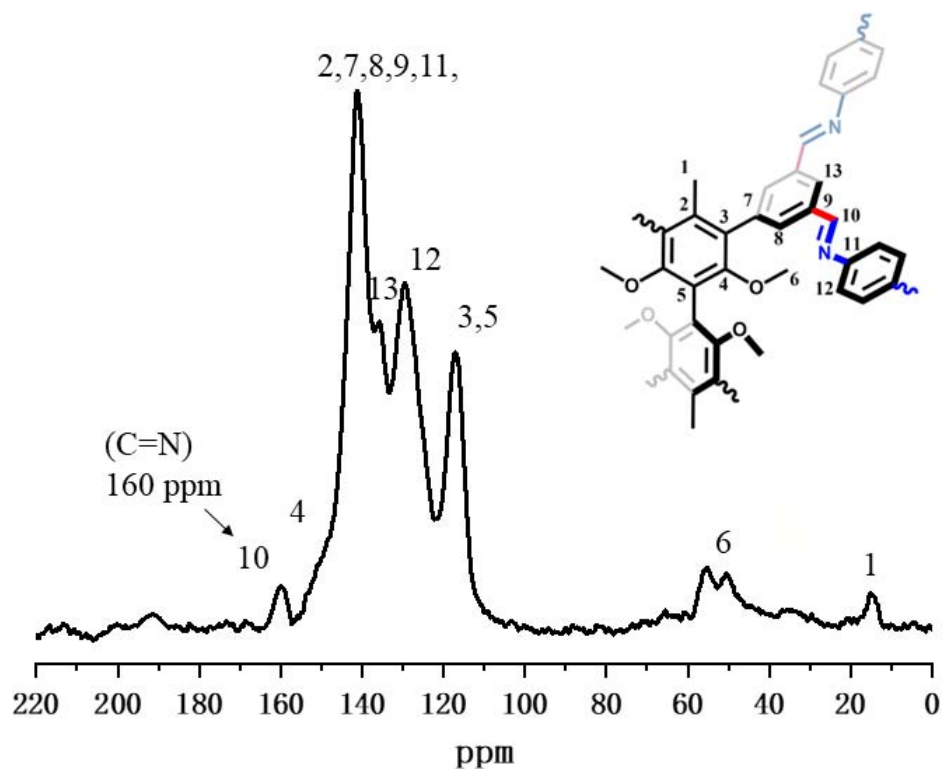

Figure S6. Solid state  $^{13}\text{C}$  NMR of JUC-588.

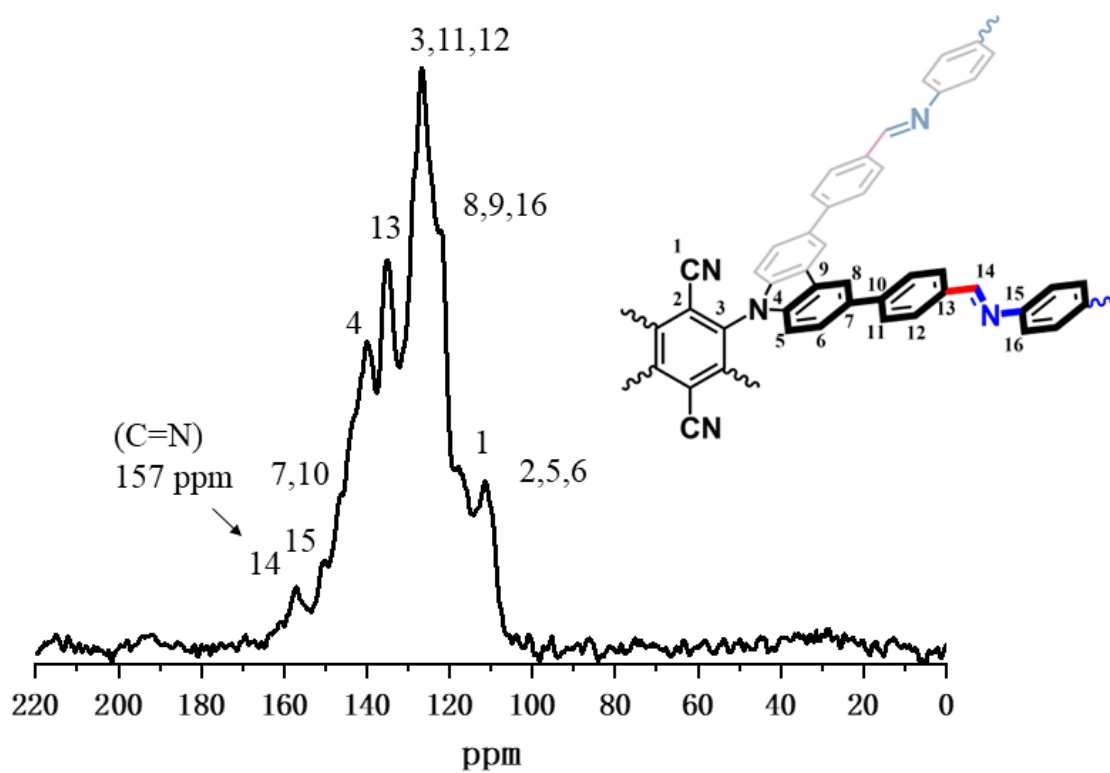

Figure S7. Solid state  $^{13}\text{C}$  NMR of JUC-589.

## Section S6. TGA curves

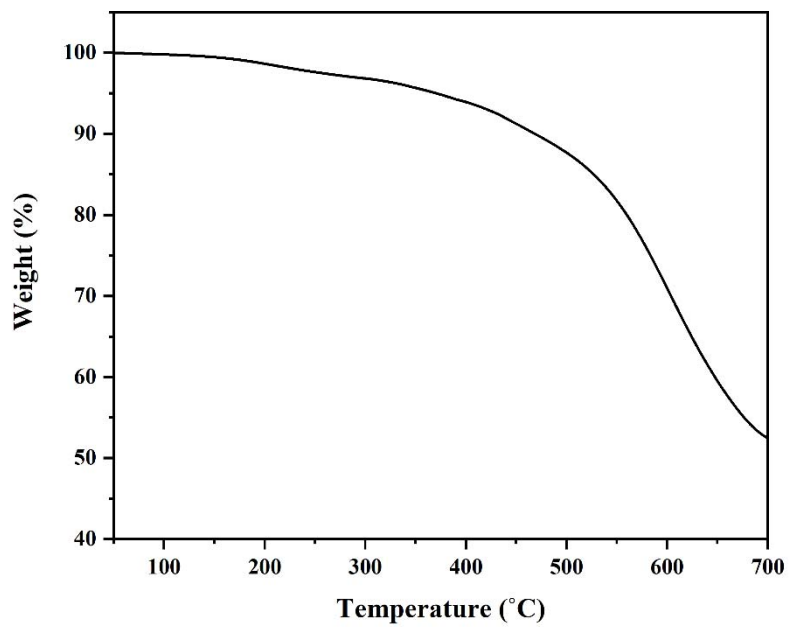

Figure S8. TGA curve of JUC-588.

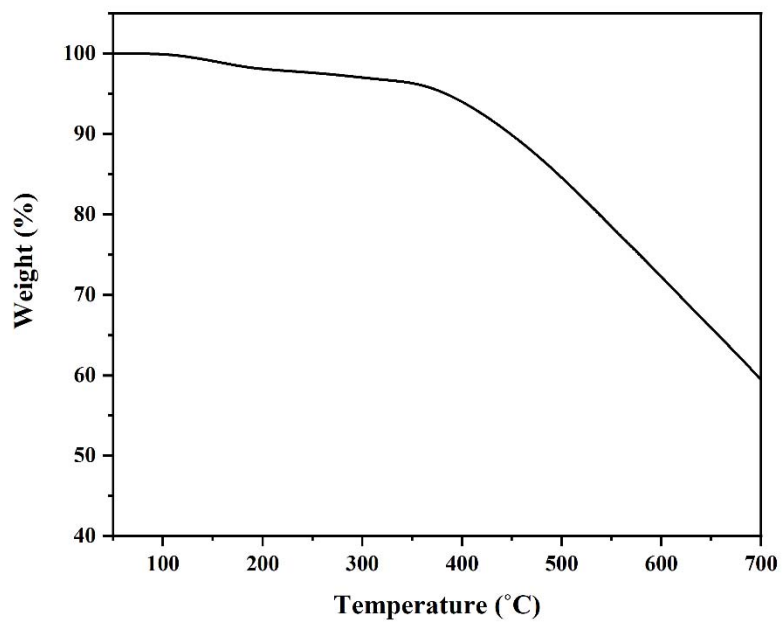

Figure S9. TGA curve of JUC-589.

## Section S7. Chemical stability

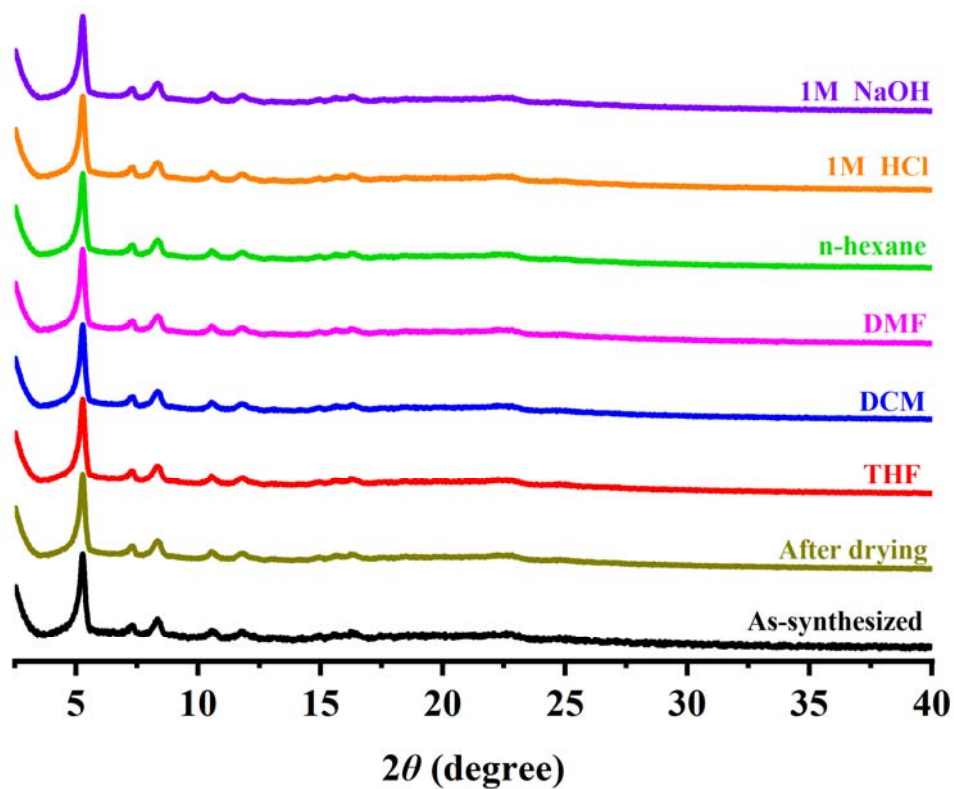

Figure S10. PXRD patterns of JUC-588 after 72 h treatment in different solvents and drying.

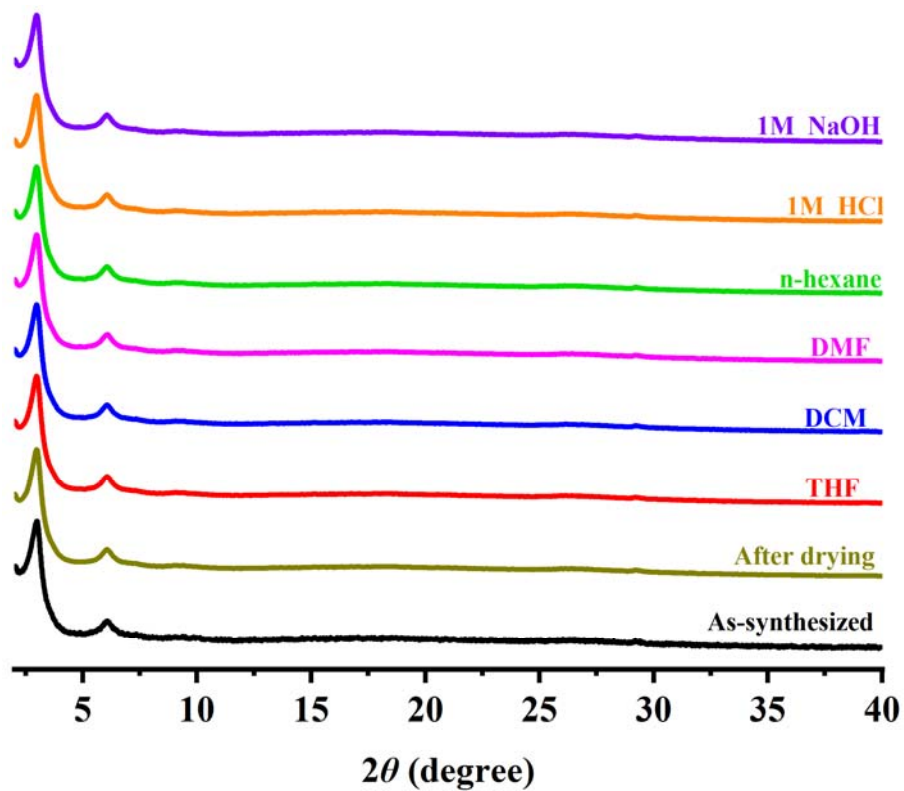

Figure S11. PXRD patterns of JUC-589 after 72 h treatment in different solvents and drying.

## Section S8. PXRD patterns

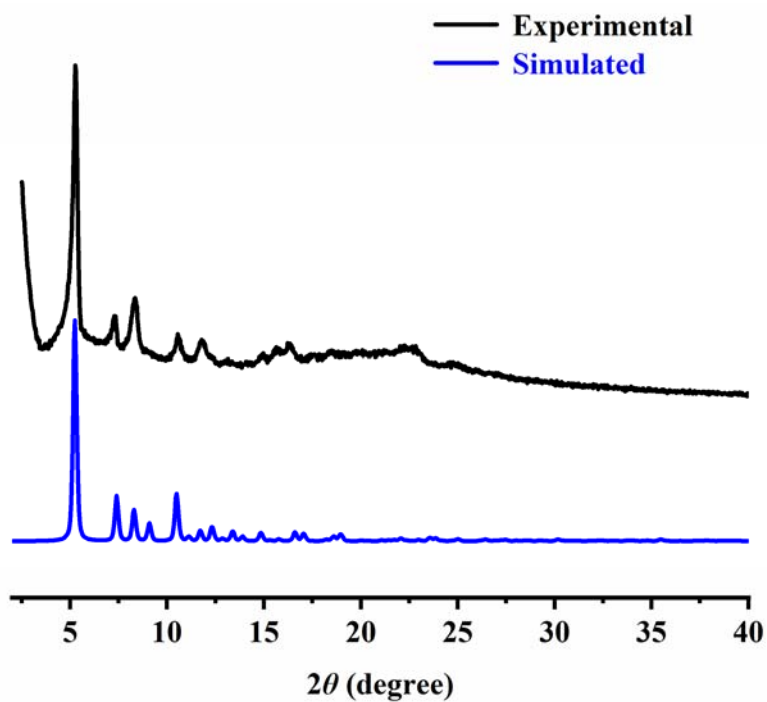

**Figure S12.** A comparison of experimental and simulated PXRD patterns of JUC-588 based on the **bcu** net.

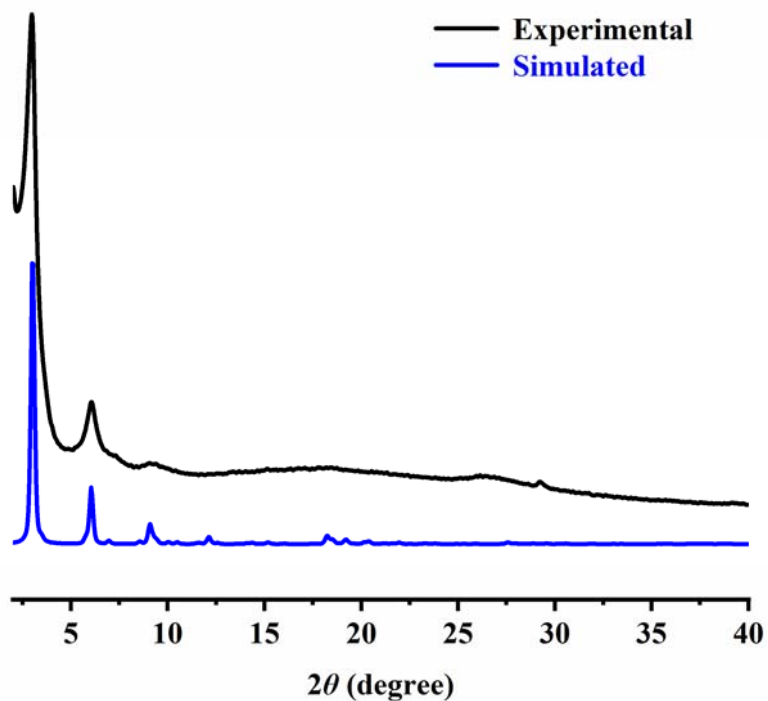

**Figure S13.** A comparison of experimental and simulated PXRD patterns of JUC-589 based on the **bcu** net.

## Section S9. Gas adsorption

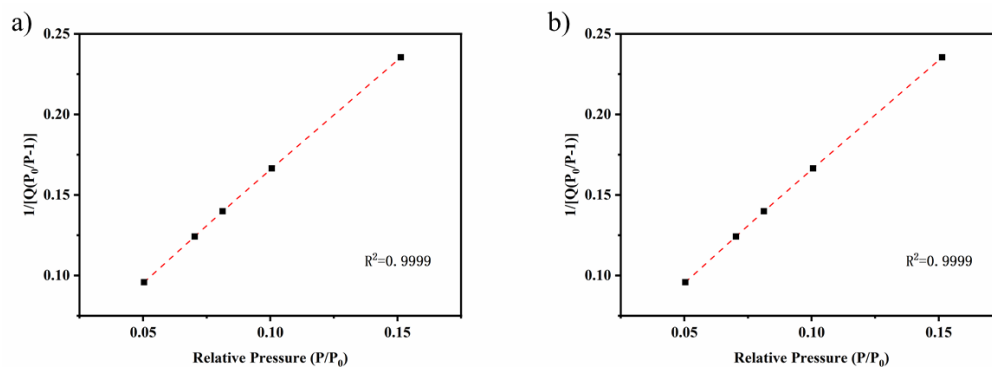

**Figure S14.** BET plots of JUC-588 (a) and JUC-589 (b) calculated from  $N_2$  adsorption isotherms at 77 K.

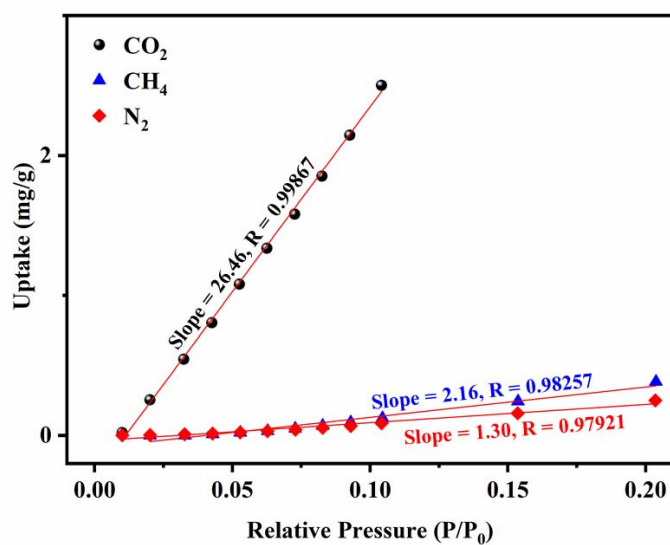

**Figure S15.** Linear fitting of the low-pressure Henry region of gas adsorption isotherms on JUC-588 measured at 273 K.



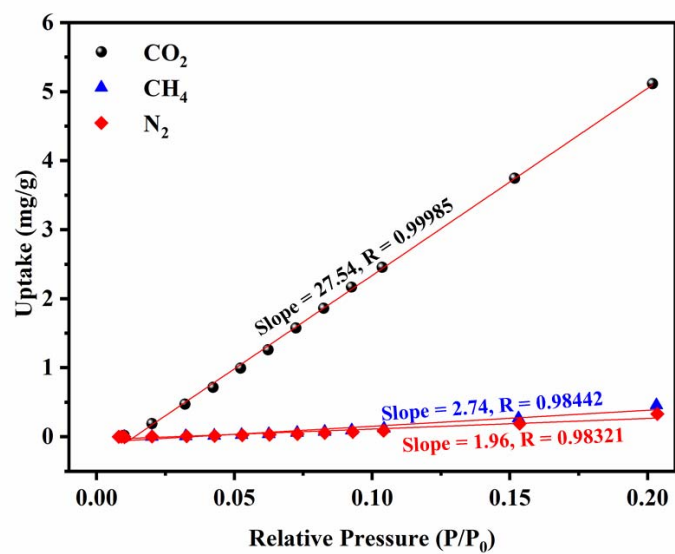

**Figure S16.** Linear fitting of the low-pressure Henry region of gas adsorption isotherms on JUC-589 measured at 273 K.

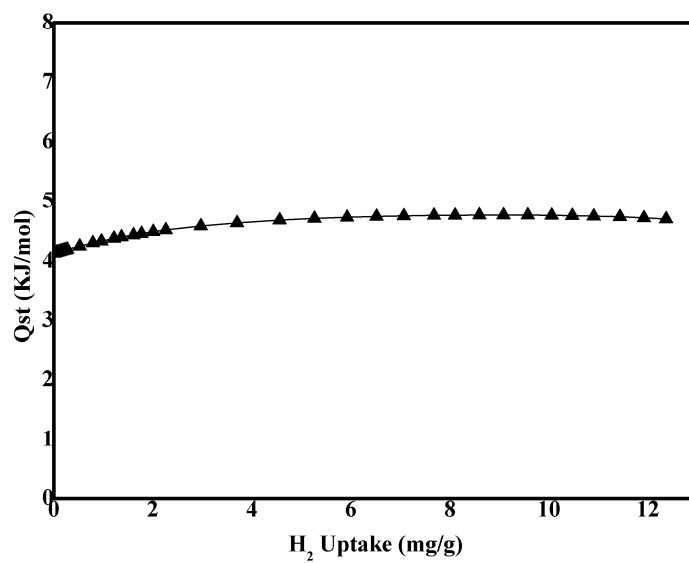

**Figure S17.** The experimental H<sub>2</sub> adsorption enthalpies (Q<sub>st</sub>) of JUC-588.

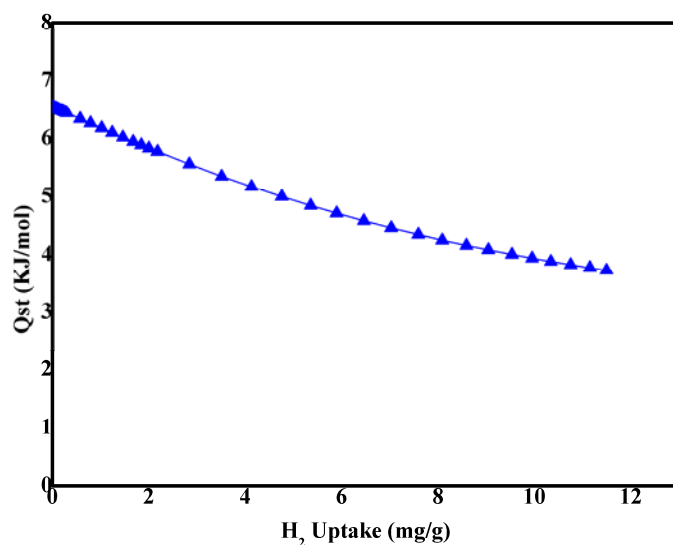

**Figure S18.** The experimental H<sub>2</sub> adsorption enthalpies ( $Q_{st}$ ) of JUC-589.

|         | BET                               | Pore volume                        | Pore size | Uptake (cm <sup>3</sup> g <sup>-1</sup> ) |                 |                | Ideal adsorption selectivity     |                                 |
|---------|-----------------------------------|------------------------------------|-----------|-------------------------------------------|-----------------|----------------|----------------------------------|---------------------------------|
|         | (m <sup>2</sup> g <sup>-1</sup> ) | (cm <sup>3</sup> g <sup>-1</sup> ) | (Å)       | CO <sub>2</sub>                           | CH <sub>4</sub> | N <sub>2</sub> | CO <sub>2</sub> /CH <sub>4</sub> | CO <sub>2</sub> /N <sub>2</sub> |
| JUC-588 | 2728                              | 3.21                               | 17        | 67                                        | 16              | 6              | 12                               | 20                              |
| JUC-589 | 2482                              | 2.27                               | 21        | 40                                        | 12              | 5              | 10                               | 14                              |

|                         | CH <sub>4</sub> uptake (cm <sup>3</sup> g <sup>-1</sup> )<br>at 273 K and 1 bar | Ref.      |
|-------------------------|---------------------------------------------------------------------------------|-----------|
| ACOF-1                  | 16.1                                                                            | 4         |
| ILCOF-1                 | 12.6                                                                            | 6         |
| TDCOF-5                 | 14.98                                                                           | 5         |
| COF-10                  | 8.12                                                                            | 4         |
| ICOF-2                  | 64.68                                                                           | 11        |
| COF-JLU2                | 53.2                                                                            | 12        |
| COF-TpAzo               | 18.76                                                                           | 13        |
| MCOF-1                  | 9                                                                               | 14        |
| Tg-AzoCOF               | 2                                                                               | 15        |
| C <sub>10</sub> -AzoCOF | 2.6                                                                             | 15        |
| H-AzoCOF                | 5.1                                                                             | 15        |
| JUC-596                 | 31                                                                              | 49        |
| JUC-597                 | 25                                                                              | 49        |
| JUC-588                 | 16                                                                              | This work |

|                                                                                                                              |                  |           |
|------------------------------------------------------------------------------------------------------------------------------|------------------|-----------|
| JUC-589                                                                                                                      | 12               | This work |
| NJU-Bai <sup>11</sup>                                                                                                        | 31.2             | 16        |
| Zn <sub>4</sub> O(L) <sub>2</sub> (NMP) <sub>2</sub> (H <sub>2</sub> O)]·2NMP·2H <sub>2</sub> O                              | 7.8              | 17        |
| [Zn(HL)(bpe) <sub>0.5</sub> ]·DMF·H <sub>2</sub> O                                                                           | 4.5              | 17        |
| [Zn(HL)-(bipy) <sub>0.5</sub> ]·DMF·H <sub>2</sub> O                                                                         | 4.1              | 17        |
| GDMU-2                                                                                                                       | 19               | 18        |
| [Ni <sub>2</sub> (μ <sub>2</sub> -OH)(bpdc)(tpt) <sub>2</sub> ][NO <sub>3</sub> ]·3DMA·4CH <sub>3</sub> OH·6H <sub>2</sub> O | 26               | 19        |
| UPC-33                                                                                                                       | 9.7              | 20        |
| IITKGP-8                                                                                                                     | 10.8             | 21        |
| ZJU-15                                                                                                                       | 15               | 22        |
| UPC-32                                                                                                                       | 31.3             | 23        |
| ZIF-95                                                                                                                       | 6.72             | 24        |
| ZIF-95                                                                                                                       | 6.94             | 24        |
| Ni(4-DPDS) <sub>2</sub> CrO <sub>4</sub>                                                                                     | 27.55            | 25        |
| {[Cu(TIA)]·1.5CH <sub>3</sub> OH} <sub>n</sub> (Cu-1 )                                                                       | 41.37            | 26        |
| MPOP1                                                                                                                        | 14.98            | 32        |
| MPOP2                                                                                                                        | 15.4             | 32        |
| MPOP3                                                                                                                        | 22.12            | 32        |
| BDPCMP-1                                                                                                                     | 10.75 (1.13 bar) | 34        |
| BDPCMP-2                                                                                                                     | 15.68 (1.13 bar) | 34        |
| BDPCMP-3                                                                                                                     | 13.44 (1.13 bar) | 34        |
| BDPCMP-4                                                                                                                     | 12.54 (1.13 bar) | 34        |
| Cz-POF-1                                                                                                                     | 32               | 35        |
| Cz-POF-2                                                                                                                     | 15.96            | 35        |
| Cz-POF-3                                                                                                                     | 35.56            | 35        |
| Cz-POF-4                                                                                                                     | 14.56            | 35        |
| B-POF                                                                                                                        | 13.8             | 36        |
| P-POF                                                                                                                        | 13.3             | 36        |
| BP-POF                                                                                                                       | 13.6             | 36        |
| MPOF-Ad-1                                                                                                                    | 21.0             | 37        |
| MPOF-Ad-2                                                                                                                    | 21.5             | 37        |
| MPOF-Ad-3                                                                                                                    | 13.7             | 37        |
| BILP-5                                                                                                                       | 21               | 38        |
| CPC-550                                                                                                                      | 60.2             | 38        |
| CPC-600                                                                                                                      | 51.8             | 38        |
| CPC-650                                                                                                                      | 49               | 38        |
| CPC-700                                                                                                                      | 47.6             | 38        |
| CPC-800                                                                                                                      | 44.8             | 38        |
| WAPC                                                                                                                         | 26.43            | 39        |
| N-WAPC                                                                                                                       | 15.0             | 39        |
| PF-600 KOH                                                                                                                   | 44.8             | 40        |
| PF-800 KOH                                                                                                                   | 50.8             | 40        |
| PF-600 ZnCl <sub>2</sub>                                                                                                     | 44.8             | 40        |
| PF-800 ZnCl <sub>2</sub>                                                                                                     | 47.4             | 40        |

|            |       |    |
|------------|-------|----|
| PSK-1-550  | 36.28 | 41 |
| PSK-2-650  | 49.28 | 41 |
| PSK-3-750  | 32.92 | 41 |
| SNMC-1-600 | 49.5  | 42 |
| SNMC-2-600 | 55.5  | 42 |
| SNMC-3-600 | 42.8  | 42 |
| CSC2-700   | 47.9  | 43 |
| CSC1-750   | 51.3  | 43 |
| CSC2-750   | 58.4  | 43 |
| CSC3-750   | 45.9  | 43 |
| CSC2-800   | 53.7  | 43 |

Table 3 | CO<sub>2</sub> uptakes for typical COFs, MOFs, POFs and porous carbons.

|                                                                                                                              | CO <sub>2</sub> uptake (cm <sup>3</sup> g <sup>-1</sup> )<br>at 273 K and 1 bar | Ref.      |
|------------------------------------------------------------------------------------------------------------------------------|---------------------------------------------------------------------------------|-----------|
| ACOF-1                                                                                                                       | 90.1                                                                            | 4         |
| COF-5                                                                                                                        | 30.03                                                                           | 4         |
| COF-103                                                                                                                      | 38.69                                                                           | 4         |
| TDCOF-5                                                                                                                      | 46.83                                                                           | 5         |
| ILCOF-1                                                                                                                      | 30.54                                                                           | 6         |
| TPA-COF-3                                                                                                                    | 46.4                                                                            | 10        |
| TPA-COF-2                                                                                                                    | 41.95                                                                           | 10        |
| TPA-COF-6                                                                                                                    | 47.03                                                                           | 10        |
| TPA-COF-5                                                                                                                    | 30.26                                                                           | 10        |
| Tg-AzoCOF                                                                                                                    | 15                                                                              | 15        |
| C <sub>10</sub> -AzoCOF                                                                                                      | 14                                                                              | 15        |
| H-AzoCOF                                                                                                                     | 21                                                                              | 15        |
| JUC-596                                                                                                                      | 84                                                                              | 49        |
| JUC-597                                                                                                                      | 70                                                                              | 49        |
| JUC-588                                                                                                                      | 67                                                                              | This work |
| JUC-589                                                                                                                      | 40                                                                              | This work |
| NJU-Bai <sub>11</sub>                                                                                                        | 130                                                                             | 16        |
| Zn <sub>4</sub> O(L) <sub>2</sub> (NMP) <sub>2</sub> (H <sub>2</sub> O)]·2NMP·2H <sub>2</sub> O                              | 20.2                                                                            | 17        |
| [Zn(HL)(bpe) <sub>0.5</sub> ]·DMF·H <sub>2</sub> O                                                                           | 28.1                                                                            | 17        |
| [Zn(HL)-(bipy) <sub>0.5</sub> ]·DMF·H <sub>2</sub> O                                                                         | 17.7                                                                            | 17        |
| GDMU-2                                                                                                                       | 74                                                                              | 18        |
| [Ni <sub>2</sub> (μ <sub>2</sub> -OH)(bpdc)(tpt) <sub>2</sub> ][NO <sub>3</sub> ]·3DMA·4CH <sub>3</sub> OH·6H <sub>2</sub> O | 108.2                                                                           | 19        |
| UPC-33                                                                                                                       | 68.1                                                                            | 20        |
| IITKGP-8                                                                                                                     | 55.4                                                                            | 21        |
| ZJU-15                                                                                                                       | 63                                                                              | 22        |
| ZIF-95                                                                                                                       | 20.16                                                                           | 24        |
| ZIF-95                                                                                                                       | 24.64                                                                           | 24        |
| {[Cu(TIA)]·1.5CH <sub>3</sub> OH} <sub>n</sub> (Cu-1 )                                                                       | 180.05                                                                          | 26        |
| MPOP1                                                                                                                        | 59.05                                                                           | 32        |

|              |                   |    |
|--------------|-------------------|----|
| MPOP2        | 52.94             | 32 |
| MPOP3        | 75.34             | 32 |
| TPDC POPs P1 | 16                | 33 |
| BDPCMP-1     | 37.632 (1.13 bar) | 34 |
| BDPCMP-2     | 50.4 (1.13 bar)   | 34 |
| BDPCMP-3     | 45.47 (1.13 bar)  | 34 |
| BDPCMP-4     | 42.78 (1.13 bar)  | 34 |
| Cz-POF-1     | 102.8             | 35 |
| Cz-POF-2     | 39.2              | 35 |
| Cz-POF-3     | 106.9             | 35 |
| Cz-POF-4     | 61.6              | 35 |
| B-POF        | 46.0              | 36 |
| P-POF        | 48.4              | 36 |
| BP-POF       | 43.5              | 36 |
| MPOF-Ad-1    | 69.5              | 37 |
| MPOF-Ad-2    | 68.5              | 37 |
| MPOF-Ad-3    | 46.0              | 37 |
| BILP-5       | 65.16             | 38 |
| CPC-550      | 186.8             | 38 |
| CPC-600      | 168.5             | 38 |
| CPC-650      | 151.2             | 38 |
| CPC-700      | 130.83            | 38 |
| CPC-800      | 120.14            | 38 |
| WAPC         | 83.5              | 39 |
| N-WAPC       | 100.8             | 39 |
| PSK-1-550    | 75.04             | 41 |
| PSK-2-650    | 118.27            | 41 |
| PSK-3-750    | 92.06             | 41 |
| SNMC-1-600   | 130.3             | 42 |
| SNMC-2-600   | 165.3             | 42 |
| SNMC-3-600   | 119.6             | 42 |
| CSC2-700     | 97.4              | 43 |
| CSC1-750     | 120.5             | 43 |
| CSC2-750     | 148.1             | 43 |
| CSC3-750     | 142.0             | 43 |
| CSC2-800     | 102.4             | 43 |

Table 4 | H<sub>2</sub> uptakes for typical COFs, MOFs, POFs and porous carbons.

|                 | H <sub>2</sub> uptake (cm <sup>3</sup> g <sup>-1</sup> )<br>At 77 K and 1 bar | Ref. |
|-----------------|-------------------------------------------------------------------------------|------|
| ACOF-1          | 110.88                                                                        | 4    |
| COF-10          | 91.84                                                                         | 4    |
| COF-5           | 94.08                                                                         | 4    |
| CoPc-PorDBA COF | 89.6                                                                          | 7    |

|                                                                                                                              |                   |           |
|------------------------------------------------------------------------------------------------------------------------------|-------------------|-----------|
| COF-103                                                                                                                      | 144.48            | 4         |
| COF-18 Å                                                                                                                     | 173.6             | 8         |
| CTF-1                                                                                                                        | 173.6             | 9         |
| TDCOF-5                                                                                                                      | 179.2             | 5         |
| JUC-596                                                                                                                      | 305               | 49        |
| JUC-597                                                                                                                      | 148               | 49        |
| JUC-588                                                                                                                      | 245               | This work |
| JUC-589                                                                                                                      | 211               | This work |
| NJU-Bai <sub>11</sub>                                                                                                        | 160.0             | 16        |
| GDMU-2                                                                                                                       | 240.7             | 18        |
| [Ni <sub>2</sub> (μ <sub>2</sub> -OH)(bpdc)(tpt) <sub>2</sub> ][NO <sub>3</sub> ]·3DMA·4CH <sub>3</sub> OH·6H <sub>2</sub> O | 203.2             | 19        |
| MOF-505                                                                                                                      | 290.08            | 27        |
| PCN-16                                                                                                                       | 291.2             | 27        |
| PCN-46                                                                                                                       | 218.4             | 27        |
| NOTT-101                                                                                                                     | 282.24            | 27        |
| NOTT-102                                                                                                                     | 250.88            | 27        |
| NJU-Bai12-ac                                                                                                                 | 213.92            | 27        |
| NU-111                                                                                                                       | 232.96            | 28        |
| Cu-BTC/GO                                                                                                                    | 272.16            | 29        |
| FJI-Y9-ht                                                                                                                    | 202.3             | 30        |
| FIR-29-ht                                                                                                                    | 136.8             | 30        |
| Cu <sub>0.625</sub> Ni <sub>0.375</sub> (BDC)TED <sub>0.5</sub>                                                              | 228.48            | 31        |
| MOF-74(Mg)                                                                                                                   | 246.4             | 31        |
| MOF-5                                                                                                                        | 212.8             | 31        |
| MIL-101(Cr)                                                                                                                  | 212.8             | 31        |
| UIO-66                                                                                                                       | 168               | 31        |
| Cu-BTC                                                                                                                       | 125.44            | 31        |
| Zn-ZIF-8                                                                                                                     | 141.12            | 31        |
| MPOP1                                                                                                                        | 98.56             | 32        |
| MPOP2                                                                                                                        | 112               | 32        |
| MPOP3                                                                                                                        | 107.52            | 32        |
| TPDC POPs P1                                                                                                                 | 68                | 33        |
| BDPCMP-1                                                                                                                     | 89.6 (1.13 bar)   | 34        |
| BDPCMP-2                                                                                                                     | 114.24 (1.13 bar) | 34        |
| BDPCMP-3                                                                                                                     | 107.52 (1.13 bar) | 34        |
| BDPCMP-4                                                                                                                     | 94.08 (1.13 bar)  | 34        |
| Cz-POF-1                                                                                                                     | 250.88            | 35        |
| Cz-POF-2                                                                                                                     | 108.64            | 35        |
| Cz-POF-3                                                                                                                     | 231.84            | 35        |
| Cz-POF-4                                                                                                                     | 115.36            | 35        |
| B-POF                                                                                                                        | 103.3             | 36        |
| P-POF                                                                                                                        | 102.8             | 36        |
| BP-POF                                                                                                                       | 100               | 36        |
| CU-600                                                                                                                       | 150.6             | 44        |

|          |        |    |
|----------|--------|----|
| CT-600   | 185.1  | 44 |
| CU-800   | 194.2  | 44 |
| CT-800   | 267.3  | 44 |
| AC-K5    | 278.8  | 45 |
| AC-K4    | 142.2  | 45 |
| AC-K3    | 249.7  | 45 |
| AC-K2    | 190.4  | 45 |
| AC       | 137.7  | 45 |
| BG-S     | 170.12 | 46 |
| NPC-1    | 234.18 | 47 |
| NPC-2    | 278.88 | 47 |
| NPC-3    | 316.96 | 47 |
| NPC-4    | 320.32 | 47 |
| CS-C     | 120.96 | 48 |
| CS-SE    | 209.44 | 48 |
| CS-AC    | 212.8  | 48 |
| CS-AC-SE | 227.36 | 48 |
| CS-SE-AC | 309.12 | 48 |

## Section S10. Dye adsorption

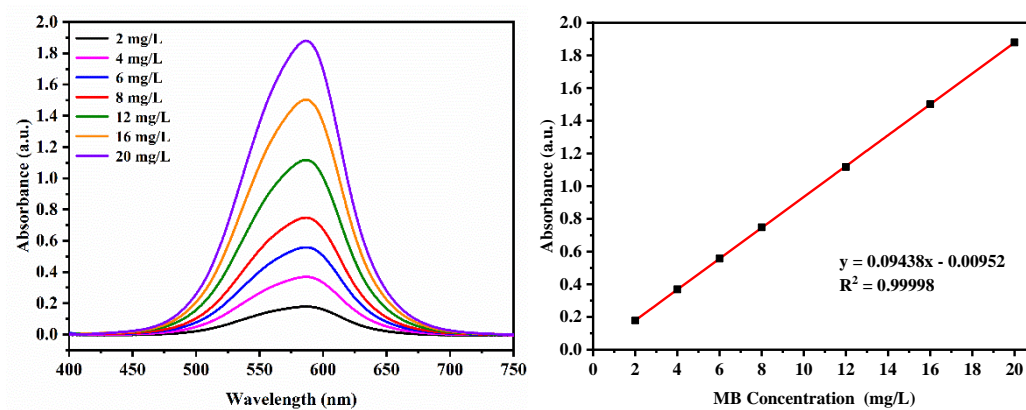

Figure S19. A standard curve of UV-Vis Spectrum for dye R250.

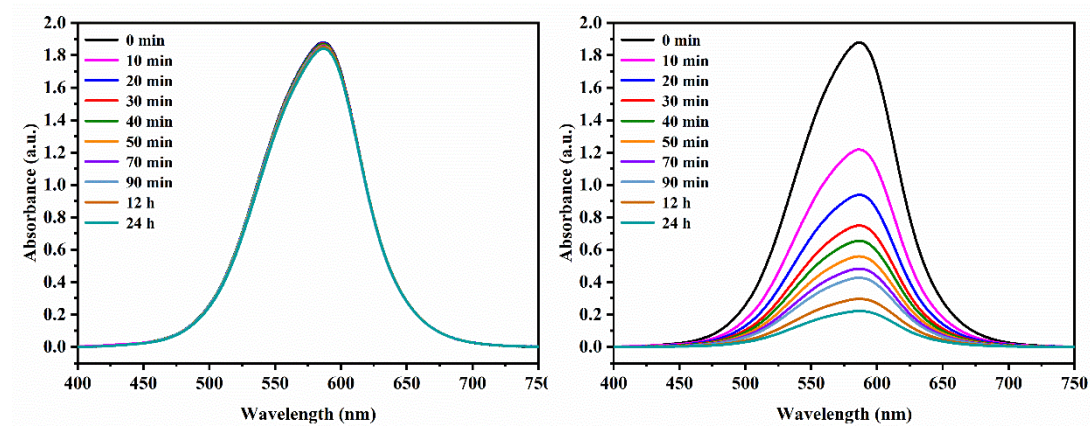

Figure S20. Adsorption of dye R250 for JUC-588 (left) and JUC-589 (right).



## Section S11: Unit cell parameters and fractional atomic coordinates

**Table S5.** Unit cell parameters and fractional atomic coordinates for JUC-588 calculated based on the **bcu** net.

|                      |         |                                                                                           |          |
|----------------------|---------|-------------------------------------------------------------------------------------------|----------|
| Space group          |         | $P4_2/nmc$                                                                                |          |
| Calculated unit cell |         | $a = b = 23.819 \text{ \AA}, c = 23.9058 \text{ \AA}, \alpha = \beta = \gamma = 90^\circ$ |          |
| Measured unit cell   |         | $a = b = 23.835 \text{ \AA}, c = 23.9071 \text{ \AA}, \alpha = \beta = \gamma = 90^\circ$ |          |
| Pawley refinement    |         | $R_p = 2.86\%, R_{wp} = 3.76\%$                                                           |          |
| atoms                | x       | y                                                                                         | z        |
| C1                   | 0.62698 | 0.54985                                                                                   | -0.32876 |
| C2                   | 0.67581 | 0.55153                                                                                   | -0.29673 |
| C3                   | 0.69267 | 0.38959                                                                                   | -0.28578 |
| N4                   | 0.7355  | 0.63062                                                                                   | -0.25889 |
| C5                   | 0.7426  | 0.3092                                                                                    | -0.25444 |
| C6                   | 0.27141 | 0.7041                                                                                    | 0.27869  |
| C7                   | 0.28673 | 0.7886                                                                                    | 0.2257   |
| H8                   | 0.60701 | 0.59147                                                                                   | -0.34136 |
| H9                   | 0.66588 | 0.35354                                                                                   | -0.30225 |
| H10                  | 0.28803 | 0.66608                                                                                   | 0.30246  |
| H11                  | 0.31588 | 0.8207                                                                                    | 0.20551  |
| C12                  | 0.5     | 0.5                                                                                       | -0.3494  |
| C13                  | 0.5     | 0.5                                                                                       | -0.46845 |
| C14                  | 0.5     | 0.5                                                                                       | 0.28533  |
| C15                  | 0.55116 | 0.5                                                                                       | -0.37901 |
| C16                  | 0.60281 | 0.5                                                                                       | -0.34519 |
| C17                  | 0.5513  | 0.5                                                                                       | -0.43964 |
| C18                  | 0.70159 | 0.5                                                                                       | -0.27999 |
| C19                  | 0.65345 | 0.5                                                                                       | -0.45132 |
| O20                  | 0.59913 | 0.5                                                                                       | -0.47504 |

**Table S6.** Unit cell parameters and fractional atomic coordinates for JUC-589 calculated based on the **bcu** net.

|                      |                                                                                                                |
|----------------------|----------------------------------------------------------------------------------------------------------------|
| Space group          | $Immm$                                                                                                         |
| Calculated unit cell | $a = 35.7099 \text{ \AA}, b = 9.7315 \text{ \AA}, c = 50.7873 \text{ \AA}, \alpha = \beta = \gamma = 90^\circ$ |

| Measured unit cell |         | $a = 35.7110 \text{ \AA}, b = 9.7331 \text{ \AA}, c = 50.7884 \text{ \AA}, \alpha = \beta = \gamma = 90^\circ$ |         |
|--------------------|---------|----------------------------------------------------------------------------------------------------------------|---------|
| Pawley refinement  |         | $R_p = 1.12\%, R_{wp} = 1.53\%$                                                                                |         |
| atoms              | x       | y                                                                                                              | z       |
| C1                 | 0.58543 | 0.7049                                                                                                         | 0.60478 |
| C2                 | 0.5313  | 0.66408                                                                                                        | 0.56562 |
| C3                 | 0.67226 | 0.7312                                                                                                         | 0.66427 |
| C4                 | 0.61539 | 0.71816                                                                                                        | 0.62535 |
| N5                 | 0.69589 | 0.75789                                                                                                        | 0.70875 |
| C6                 | 0.70244 | 0.7303                                                                                                         | 0.68415 |
| C7                 | 0.72365 | 0.75472                                                                                                        | 0.72928 |
| C8                 | 0.47951 | 0.68112                                                                                                        | 0.59152 |
| C9                 | 0.4532  | 0.69915                                                                                                        | 0.61162 |
| C10                | 0.4045  | 0.69509                                                                                                        | 0.5777  |
| C11                | 0.43142 | 0.67232                                                                                                        | 0.55816 |
| C12                | 0.34816 | 0.66905                                                                                                        | 0.62034 |
| C13                | 0.32021 | 0.67641                                                                                                        | 0.6394  |
| C14                | 0.36369 | 0.78319                                                                                                        | 0.66952 |
| C15                | 0.39177 | 0.7776                                                                                                         | 0.6502  |
| C16                | 0.23781 | 0.77111                                                                                                        | 0.72417 |
| C17                | 0.28819 | 0.73498                                                                                                        | 0.75527 |
| H18                | 0.73    | 0.69699                                                                                                        | 0.67796 |
| H19                | 0.46267 | 0.70673                                                                                                        | 0.63177 |
| H20                | 0.37585 | 0.70673                                                                                                        | 0.57128 |
| H21                | 0.42339 | 0.66403                                                                                                        | 0.53767 |
| H22                | 0.34093 | 0.62092                                                                                                        | 0.60189 |
| H23                | 0.29269 | 0.63597                                                                                                        | 0.63483 |
| H24                | 0.3701  | 0.82825                                                                                                        | 0.68849 |
| H25                | 0.41887 | 0.82085                                                                                                        | 0.65483 |
| H26                | 0.22761 | 0.79076                                                                                                        | 0.70449 |
| H27                | 0.31769 | 0.72191                                                                                                        | 0.75954 |
| N28                | 0.5     | 0.64854                                                                                                        | 0.54844 |
| C29                | 0.5     | 0.57036                                                                                                        | 0.52436 |
| C30                | 0.5     | 0.63519                                                                                                        | 0.5     |
| N31                | 0.5     | 0.88382                                                                                                        | 0.5     |
| C32                | 0.5     | 0.77037                                                                                                        | 0.5     |

## Section S12. References

- (1) V. Abet, F. T. Szczypinski, M. A. Little, V. Santolini, C. D. Jones, R. Evans, C. Wilson, X. Wu, M. F. Thorne, M. J. Bennison, P. Cui, A. I. Cooper, K. E. Jelfs and A. G. Slater, *Angew Chem Int Edit*, 2020, **59**, 20272-20272.
- (2) W. G. Lu, Z. W. Wei, D. Q. Yuan, J. Tian, S. Fordham and H. C. Zhou, *Chem Mater*, 2014, **26**, 4589-4597.
- (3) J. W. Li, Y. W. Ren, C. R. Qi and H. F. Jiang, *Eur J Inorg Chem*, 2017, **11**, 1478-1487.
- (4) Z. P. Li, X. Feng, Y. C. Zou, Y. W. Zhang, H. Xia, X. M. Liu and Y. Mu, *Chem Commun*, 2014, **50**, 13825-13828.
- (5) Z. Kahveci, T. Islamoglu, G. A. Shar, R. Ding and H. M. El-Kaderi, *Crystengcomm*, 2013, **15**, 1524-1527.
- (6) M. G. Rabbani, A. K. Sekizkardes, Z. Kahveci, T. E. Reich, R. S. Ding and H. M. El-Kaderi, *Chem-Eur J*, 2013, **19**, 3324-3328.
- (7) V. S. P. K. Neti, X. F. Wu, S. G. Deng and L. Echegoyen, *Crystengcomm*, 2013, **15**, 6892-6895.
- (8) R. W. Tilford, S. J. Mugavero, P. J. Pellechia and J. J. Lavigne, *Adv Mater*, 2008, **20**, 2741-2746.
- (9) P. Kuhn, M. Antonietti and A. Thomas, *Angew Chem Int Edit*, 2008, **47**, 3450-3453.
- (10) A. F. M. El-Mahdy, C. H. Kuo, A. Alshehri, C. Young, Y. Yamauchi, J. Kim and S. W. Kuo, *Journal of Materials Chemistry A*, 2018, **6**, 19532-19541.
- (11) Y. Du, H. S. Yang, J. M. Whiteley, S. Wan, Y. H. Jin, S. H. Lee and W. Zhang, *Angew Chem Int Edit*, 2016, **55**, 1737-1741.
- (12) Z. P. Li, Y. F. Zhi, X. Feng, X. S. Ding, Y. C. Zou, X. M. Liu and Y. Mu, *Chem-Eur J*, 2015, **21**, 12079-12084.
- (13) R. Ge, D. D. Hao, Q. Shi, B. Dong, W. G. Leng, C. Wang and Y. N. Gao, *J Chem Eng Data*, 2016, **61**, 1904-1909.
- (14) H. P. Ma, H. Ren, S. Meng, Z. J. Yan, H. Y. Zhao, F. X. Sun and G. S. Zhu, *Chem Commun*, 2013, **49**, 9773-9775.
- (15) S. F. Huang, Y. M. Hu, L. L. Tan, S. Wan, S. Yazdi, Y. H. Jin and W. Zhang, *Acs Appl Mater Inter*, 2020, **12**, 51517-51522.
- (16) K. Z. Tang, R. R. Yun, Z. Y. Lu, L. T. Du, M. X. Zhang, Q. Wang and H. Y. Liu, *Cryst Growth Des*, 2013, **13**, 1382-1385.
- (17) Y. Zhao, L. Wang, N. N. Fan, M. L. Han, G. P. Yang and L. F. Ma, *Cryst Growth Des*, 2018, **18**, 7114-7121.
- (18) J. Q. Liu, G. L. Liu, C. Y. Gu, W. C. Liu, J. W. Xu, B. H. Li and W. J. Wang, *Journal of Materials Chemistry A*, 2016, **4**, 11630-11634.
- (19) L. Zhang, J. J. Qian, W. B. Yang, X. F. Kuang, J. Zhang, Y. X. Cui, W. M. Wu, X. Y. Wu, C. Z. Lu and W. Z. Chen, *Journal of Materials Chemistry A*, 2015, **3**, 15399-15402.
- (20) W. D. Fan, Y. T. Wang, Q. Zhang, A. Kirchon, Z. Y. Xiao, L. L. Zhang, F. N. Dai, R. M. Wang and D. F. Sun, *Chem-Eur J*, 2018, **24**, 2137-2143.
- (21) S. Chand, A. Pal and M. C. Das, *Chem-Eur J*, 2018, **24**, 5982-5986.
- (22) . Duan, Y. Zhou, R. Lv, B. Yu, H. D. Chen, Z. G. Ji, Y. J. Cui, Y. Yang and G. D. Qian, *J Solid State Chem*, 2018, **260**, 31-33.

- (23) W. D. Fan, Y. T. Wang, Z. Y. Xiao, Z. D. Huang, F. N. Dai, R. M. Wang and D. F. Sun, *Chinese Chem Lett*, 2018, **29**, 865-868.
- (24) Z. H. Rada, H. R. Abid, H. Q. Sun, J. Shang, J. Y. Li, Y. D. He, S. M. Liu and S. B. Wang, *Prog Nat Sci-Mater*, 2018, **28**, 160-167.
- (25) F. Zheng, L. H. Chen, R. D. Chen, Z. G. Zhang, Q. W. Yang, Y. W. Yang, B. G. Su, Q. L. Ren and Z. B. Bao, *Sep Purif Technol*, 2022, **281**, 119911.
- (26) Z. L. Ma, P. X. Liu, Z. Y. Liu, J. J. Wang, L. B. Li and L. Tian, *Inorg Chem*, 2021, **60**, 6550-6558.
- (27) B. S. Zheng, R. R. Yun, J. F. Bai, Z. Y. Lu, L. T. Du and Y. Z. Li, *Inorg Chem*, 2013, **52**, 2823-2829.
- (28) S. Suepaul, K. A. Forrest, T. Pham and B. Space, *Cryst Growth Des*, 2018, **18**, 7599-7610.
- (29) A. M. Varghese, K. S. K. Reddy and G. N. Karanikolos, *Ind Eng Chem Res*, 2022, **61**, 6200-6213.
- (30) F. J. Zhao, Y. X. Tan, W. J. Wang, Z. F. Ju and D. Q. Yuan, *Inorg Chem*, 2018, **57**, 13312-13317.
- (31) R. J. Li, X. Han, Q. N. Liu, A. Qian, F. F. Zhu, J. W. Hu, J. Fan, H. T. Shen, J. C. Liu, X. Pu, H. T. Xu and B. Mu, *Acs Omega*, 2022, **7**, 20081-20091.
- (32) G. Li, Q. Q. Liu, B. J. Xia, J. Huang, S. Z. Li, Y. Z. Guan, H. Zhou, B. Liao, Z. H. Zhou and B. Liu, *Eur Polym J*, 2017, **91**, 242-247.
- (33) S. Bandyopadhyay, P. Pallavi, A. G. Anil and A. Patra, *Polym Chem-Uk*, 2015, **6**, 3775-3780.
- (34) Y. F. Xu, D. Chang, S. Feng, C. Zhang and J. X. Jiang, *New J Chem*, 2016, **40**, 9415-9423.
- (35) X. Zhang, J. Z. Lu and J. Zhang, *Chem Mater*, 2014, **26**, 4023-4029.
- (36) G. L. Xing, T. T. Yan, S. Das, L. Ye and K. Q. Ye, *Rsc Adv*, 2018, **8**, 20434-20439.
- (37) W. Q. Wen, P. S. Shuttleworth, H. B. Yue, J. P. Fernandez-Blazquez and J. W. Guo, *Acs Appl Mater Inter*, 2020, **12**, 7548-7556.
- (38) B. Ashourirad, A. K. Sekizkardes, S. Altarawneh and H. M. El-Kaderi, *Chem Mater*, 2015, **27**, 1349-1358.
- (39) Y. Li, R. Xu, B. B. Wang, J. P. Wei, L. Y. Wang, M. Q. Shen and J. Yang, *Nanomaterials-Basel*, 2019, **9**, 266.
- (40) J. Wang, R. Krishna, X. F. Wu, Y. Q. Sun and S. G. Deng, *Langmuir*, 2015, **31**, 9845-9852.
- (41) Y. Zhang, Z. Q. Wei, X. Liu, F. Liu, Z. H. Yan, S. Y. Zhou, J. Wang and S. G. Deng, *Rsc Adv*, 2022, **12**, 8592-8599.
- (42) P. X. Zhang, Y. Zhong, J. Ding, J. Wang, M. Xu, Q. Deng, Z. L. Zeng and S. G. Deng, *Chemical Engineering Journal*, 2019, **355**, 963-973.
- (43) C. C. Song, W. Y. Ye, Y. C. Liu, H. Huang, H. Zhang, H. Lin, R. W. Lu and S. F. Zhang, *Acs Omega*, 2020, **5**, 28255-28263.
- (44) D. D. Wang, Y. L. Shen, Y. L. Chen, L. L. Liu and Y. F. Zhao, *Chem. Eng. J.*, 2019, **367**, 260-268.
- (45) H. L. Wang, Q. M. Gao and J. Hu, *J. Am. Chem. Soc.*, 2009, **131**, 7016-7022.
- (46) H. Y. Zhang, Y. W. Zhu, Q. Y. Liu and X. W. Li, *Appl Energ*, 2022, **306**.
- (47) R. Mishra, P. R. Prasad, P. Panda and S. Barman, *Energ Fuel*, 2021, **35**, 14177-14187.
- (48) J. H. Park and S. J. Park, *Carbon*, 2020, **158**, 364-371.
- (49) C. Y. Yu, H. Li, Y. J. Wang, J. Q. Suo, X. Y. Guan, R. Wang, V. Valtchev, Y. S. Yan, S. L. Qiu,

Q. R. Fang, *Angew. Chem. Int. Ed.*, 2022, **61**, e202117101.
